# Supplementary material for: A Cryptic Subterranean Mammal Species, the Lesser Blind Mole Rat (Nannospalax leucodon syrmiensis)—Retreated but Not Extinct
Source: MDPI journal article supplement (doi:10.3390/ani14050774), 2024-02-29
Supplement: s1 [file s1]

**Table S1.** A list of 22 new *N. leucodon* and samples imported from GenBank, with IDs (GenBank accession numbers) for mtDNA gene sequences. *2n*—diploid chromosomal numbers; *NF*—fundamental number of chromosomal arms.

<sup>is</sup> - Collection Ivo Savic, IBISS; ISO – ISO country code.

| <i>16S rRNA</i> ID | <i>MT-CYTB</i> ID | Sample No           | Sampling locality, ISO | CF/species               | <i>2n/NF</i> | Reference  | <i>16SrRNA/MT-CYTB</i> |
|--------------------|-------------------|---------------------|------------------------|--------------------------|--------------|------------|------------------------|
| PP349447           | PP378197          | 85RS                | Čortanovci, RS         | <i>montanosyrmiensis</i> | 54/86        | This study |                        |
| PP349461           | PP378191          | 87RS                | Košutnjak, RS          | <i>syrmiensis</i>        | 54/90        | This study |                        |
| PP349460           | PP378192          | 91RS                | Vinča, RS              | <i>syrmiensis</i>        | 54/90        | This study |                        |
| PP349459           | PP378193          | 92RS                | Vinča, RS              | <i>syrmiensis</i>        | 54/90        | This study |                        |
| PP349458           | PP378194          | 93RS                | Udovice, RS            | <i>syrmiensis</i>        | 54/90        | This study |                        |
| PP349457           | PP378195          | 94RS                | Višnjica, RS           | <i>syrmiensis</i>        | 54/90        | This study |                        |
| PP349456           | PP378196          | 95RS                | Višnjica, RS           | <i>syrmiensis</i>        | 54/90        | This study |                        |
| PP349437           | PP378179          | 96RS                | Deliblato, RS          | <i>hungaricus</i>        | 48/84        | This study |                        |
| PP349443           | PP378183          | 97RS                | Ristovac, RS           | <i>serbicus</i>          | 54/98        | This study |                        |
| PP349442           | PP378184          | 98RS                | Stara Planina, RS      | <i>serbicus</i>          | 54/98        | This study |                        |
| PP349455           | PP378188          | 99RS <sup>is</sup>  | Vinča, RS              | <i>syrmiensis</i>        | 54/90        | This study |                        |
| PP349436           | PP378178          | 100RS <sup>is</sup> | Avala, RS              | <i>hungaricus</i>        | 48/84        | This study |                        |
| PP349454           | PP378189          | 101RS <sup>is</sup> | Stara Pazova, RS       | <i>syrmiensis</i>        | 54/90        | This study |                        |
| PP349453           | PP378190          | 102RS <sup>is</sup> | Jajinci, RS            | <i>syrmiensis</i>        | 54/90        | This study |                        |
| PP349438           | /                 | 103RS               | Deliblato, RS          | <i>hungaricus</i>        | 48/84        | This study |                        |
| PP349439           | /                 | 104RS               | Deliblato, RS          | <i>hungaricus</i>        | 48/84        | This study |                        |
| PP349449           | PP378198          | 106RS               | Krušedol, RS           | <i>montanosyrmiensis</i> | 54/86        | This study |                        |
| PP349450           | PP378199          | 107RS               | Krušedol, RS           | <i>montanosyrmiensis</i> | 54/86        | This study |                        |
| PP349452           | PP378186          | 108RS               | Ševarice, RS           | <i>montanoserbicus</i>   | 56/82        | This study |                        |
| PP349448           | PP378201          | 110RS               | Stražilovo, RS         | <i>montanosyrmiensis</i> | 54/86        | This study |                        |

|          |          |                    |                              |                          |       |                                         |
|----------|----------|--------------------|------------------------------|--------------------------|-------|-----------------------------------------|
| PP349451 | PP378187 | 112RS              | Ševarice, RS                 | <i>montanoserbicus</i>   | 56/82 | This study                              |
| PP349445 | PP378185 | 113RS              | Klenike, RS                  | <i>serbicus</i>          | 54/98 | This study                              |
| MH979026 | OM714859 | 1RS                | Šumarak , RS                 | <i>hungaricus</i>        | 48/84 | Bugarski-Stanojević et al.<br>2020/2022 |
| MH979027 | OM714860 | 2RS                | Šumarak, RS                  | <i>hungaricus</i>        | 48/84 | Bugarski-Stanojević et al.<br>2020/2022 |
| MH979028 | OM714861 | 3RS                | Ristovac, RS                 | <i>serbicus</i>          | 54/98 | Bugarski-Stanojević et al.<br>2020/2022 |
| MH979029 | OM714862 | 4RS                | Pančevo, RS                  | <i>hungaricus</i>        | 48/84 | Bugarski-Stanojević et al.<br>2020/2022 |
| MH979030 | OM714863 | 5RS                | Kajtasovo, RS                | <i>hungaricus</i>        | 48/84 | Bugarski-Stanojević et al.<br>2020/2022 |
| MH979031 | OM714864 | 7RS <sup>is</sup>  | Beograd (Banovo<br>brdo), RS | <i>syrmiensis</i>        | 54/90 | Bugarski-Stanojević et al.<br>2020/2022 |
| MH979032 | OM714865 | 8RS <sup>is</sup>  | Stražilovo, RS               | <i>montanosyrmiensis</i> | 54/86 | Bugarski-Stanojević et al.<br>2020/2022 |
| MH979033 | OM714866 | 9RS <sup>is</sup>  | Zlatibor Mt, RS              | <i>montanoserbicus</i>   | 56/82 | Bugarski-Stanojević et al.<br>2020/2022 |
| /        | OM714867 | 11RS <sup>is</sup> | Vlasina, RS                  | <i>montanoserbicus</i>   | 56/82 | Bugarski-Stanojević et al. 2022         |
| MH979035 | OM714871 | 22RS               | Klinovac, RS                 | <i>serbicus</i>          | 54/98 | Bugarski-Stanojević et al.<br>2020/2022 |
| /        | OM714872 | 23RS               | Vlasina, RS                  | <i>montanoserbicus</i>   | 56/82 | Bugarski-Stanojević et al. 2022         |
| OL348372 | OM714881 | 38SL               | Beograd<br>(Košutnjak), RS   | <i>syrmiensis</i>        | 54/90 | Bugarski-Stanojević et al. 2022         |
| OM691468 | OM714882 | 39RS               | Ristovac, RS                 | <i>serbicus</i>          | 54/98 | Bugarski-Stanojević et al. 2022         |

|          |            |      |                                      |                          |       |                                  |
|----------|------------|------|--------------------------------------|--------------------------|-------|----------------------------------|
| OL348373 | OM714883   | 40RS | Beograd<br>(Košutnjak), RS           | <i>syrmiensis</i>        | 54/90 | Bugarski-Stanojević et al. 2022  |
| OM691469 | OM714884   | 41RS | Vlasina, RS                          | <i>montanoserbicus</i>   | 56/82 | Bugarski-Stanojević et al. 2022  |
| OM691470 | OM714OM885 | 42RS | Jadovnik Mt.<br>(Prijepolje), RS     | <i>montanoserbicus</i>   | 56/82 | Bugarski-Stanojević et al. 2022. |
| OM691471 | OM714886   | 43RS | Vršački breg, RS                     | <i>hungaricus</i>        | 48/84 | Bugarski-Stanojević et al. 2022  |
| OL348374 | OM714887   | 44RS | Beograd (Banjica),<br>RS             | <i>syrmiensis</i>        | 54/90 | Bugarski-Stanojević et al. 2022  |
| OL348375 | OM714893   | 62RS | Sremski Karlovci<br>(Stražilovo), RS | <i>montanosyrmiensis</i> | 54/86 | Bugarski-Stanojević et al. 2022  |
| OL348376 | OM714894   | 63RS | Sremski Karlovci<br>(Stražilovo), RS | <i>montanosyrmiensis</i> | 54/86 | Bugarski-Stanojević et al. 2022. |
| OM691478 | OM714895   | 64RS | Vlasina, RS                          | <i>montanoserbicus</i>   | 56/82 | Bugarski-Stanojević et al. 2022  |
| OM691479 | OM714896   | 65RS | Mačvanski<br>Pričinović, RS          | <i>montanoserbicus</i>   | 56/82 | Bugarski-Stanojević et al. 2022  |
| HQ652170 | /          |      | Mezőtúr, HU                          | <i>hungaricus</i>        | 48/84 | Hadid et al. 2012                |
| HQ652165 | /          |      | Šušara, RS                           | <i>hungaricus</i>        | 48/84 | Hadid et al. 2012                |
| HQ652171 | /          |      | Subotička Peščara,<br>RS             | <i>montanosyrmiensis</i> | 54/86 | Hadid et al. 2012                |
| HQ652168 | /          |      | “isolate 6063”                       | <i>montanosyrmiensis</i> | 54/86 | Hadid 2010                       |
| HQ652184 | /          |      | Karaman, TU                          | <i>N. xanthodon</i>      | 60    | Hadid et al. 2012                |
| HQ652185 | /          |      | Konya, TU                            | <i>N. xanthodon</i>      | 62    | Hadid et al. 2012                |
| HQ652187 | /          |      | Malatya, TU                          | <i>N. x. vasvarii</i>    | 60    | Hadid et al. 2012                |
| HQ652176 | /          |      | Ankara, TU                           | <i>N. xanthodon</i>      | 62    | Hadid et al. 2012                |
| HQ652181 | /          |      | Denizili, TU                         | <i>N. xanthodon</i>      | 60    | Hadid et al. 2012                |
| HQ652154 | /          |      | Alma, IL                             | <i>N. e. galili</i>      | 52    | Hadid et al. 2012                |

|          |          |                      |                          |       |                      |
|----------|----------|----------------------|--------------------------|-------|----------------------|
| HQ652153 | /        | Alma, IL             | <i>N. e. galili</i>      | 52    | Hadid et al. 2012    |
| HQ652164 | /        | Mt. Hermon, IL       | <i>N. e. golani</i>      | 54    | Hadid et al. 2012    |
| HQ652166 | /        | El Al, IL            | <i>N. e. golani</i>      | 54    | Hadid et al. 2012    |
| HQ652177 | /        | Anza, IL             | <i>N. e. judaei</i>      | 60    | Hadid et al. 2012    |
| HQ652186 | /        | Lahav, IL            | <i>N. e. judaei</i>      | 60    | Hadid et al. 2012    |
| JN571137 | /        | Muhraka, IL          | <i>N. e. carmeli</i>     | 58    | Hadid et al. 2012    |
| NC020756 | /        | Mt Carmel, IL        | <i>N. e. carmeli</i>     | 58    | Hadid et al. 2012    |
| HQ652192 | /        | Iași, RO             | <i>Spalax graecus</i>    | 62    | Hadid 2010           |
| HQ652193 | /        | Kherson, UA          | <i>S. arenarius</i>      | 62    | Hadid 2010           |
| HQ652172 | /        | Novomoszkovsz,<br>UA | <i>S. microphthalmus</i> | 60    | Hadid 2010           |
| <hr/>    |          |                      |                          |       |                      |
| /        | JN656390 | Kelebia, RS          | <i>montanosyrmiensis</i> | 54/86 | Nemeth et al. 2013   |
| /        | JN656389 | Stražilovo, RS       | <i>montanosyrmiensis</i> | 54/86 | Nemeth et al. 2013   |
| /        | JN656386 | Čortanovci, RS       | <i>montanosyrmiensis</i> | 54/86 | Nemeth et al. 2013   |
| /        | FJ656298 | Kastamonu, TU        | <i>N. xanthodon</i>      | 2n60  | Kandemir et al. 2012 |
| /        | FJ656297 | Karabük, TU          | <i>N. xanthodon</i>      | 2n60  | Kandemir et al. 2012 |
| /        | FJ656296 | Kütahya, TU          | <i>N. xanthodon</i>      | 2n60  | Kandemir et al. 2012 |
| /        | FJ656292 | Isparta, TU          | <i>N. xanthodon</i>      | 2n56  | Kandemir et al. 2012 |
| /        | NC020756 | Carmel Mt, IL        | <i>N. carmeli</i>        | 58    | Hadid et al. 2012    |
| /        | JN571137 | Carmel Mt, IL        | <i>N. carmeli</i>        | 58    | Hadid et al. 2012    |
| /        | JN571135 | Judean Mt, IL        | <i>N. judaei</i>         | 60    | Hadid et al. 2012    |
| /        | JN571136 | Judean Mt, IL        | <i>N. judaei</i>         | 60    | Hadid et al. 2012    |
| /        | JN571134 | Golan Heights, IL    | <i>N. golani</i>         | 54    | Hadid et al. 2012    |
| /        | NC020757 | Golan Heights, IL    | <i>N. golani</i>         | 54    | Hadid et al. 2012    |
| /        | JN571130 | Galilee Mt, IL       | <i>N. galili</i>         | 52    | Hadid et al. 2012    |

|   |          |                      |                          |    |                    |
|---|----------|----------------------|--------------------------|----|--------------------|
| / | JN571129 | Galilee Mt, Il       | <i>N. galili</i>         | 52 | Hadid et al. 2012  |
| / | KF021257 | Sândulești, RO       | <i>S. antiquus</i>       | 62 | Nemeth et al. 2013 |
| / | KF021252 | David Valley, RO     | <i>S. graecus</i>        | 62 | Nemeth et al. 2013 |
| / | KF021258 | Novomoszkovsz,<br>UK | <i>S. microphthalmus</i> | 60 | Nemeth et al. 2013 |
| / | KF021262 | Kherson, UK          | <i>S. arenarius</i>      | 62 | Nemeth et al. 2013 |
| / | KF021261 | Krivij Rig, UK       | <i>S. zemni</i>          | 62 | Nemeth et al. 2013 |

---
